# Supplementary material for: Lung cancer incidence decreases with elevation: evidence for oxygen as an inhaled carcinogen
Source: PubMed Central journal article supplement (PMC4304851; doi:10.7717/peerj.705), 2015-01-13

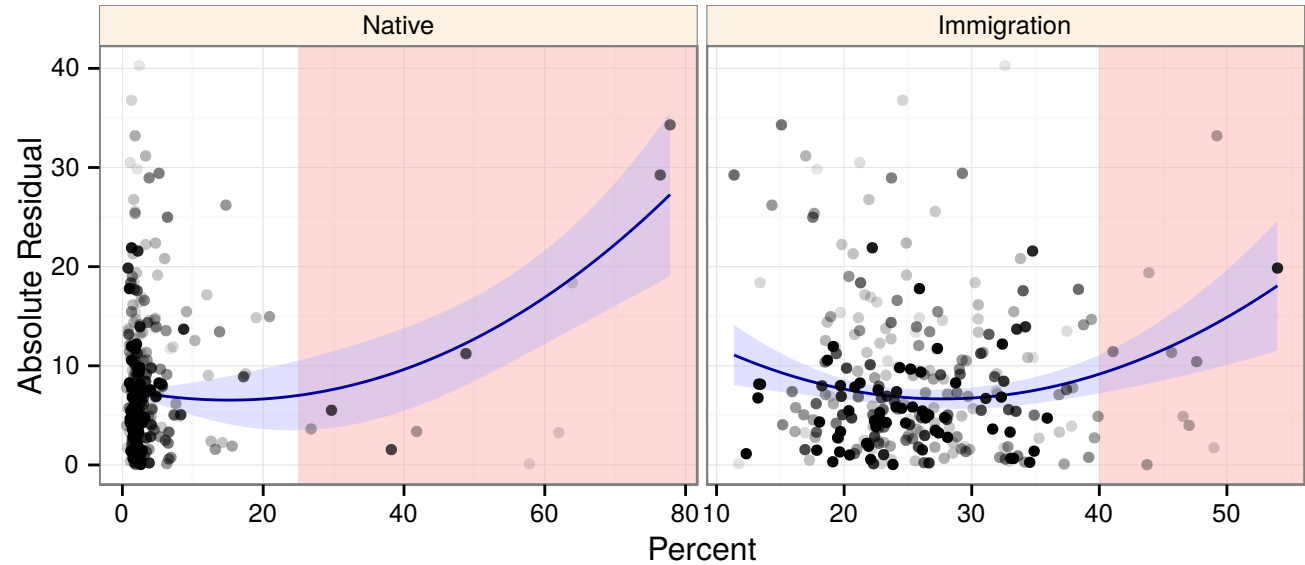

Supplement: peerj-03-705-s001.pdf [file peerj-03-705-s001.pdf]
